# Supplementary material for: Electrospun TiO2 nanofibers integrating space-separated magnetic nanoparticles and heterostructures for recoverable and efficient photocatalyst
Source: Royal Society of Chemistry journal article supplement (doi:10.1039/c4ta02224f), 2014-01-01
Supplement: c4ta02224f1.pdf [file c4ta02224f1.pdf]

Electronic Supplementary Information (ESI):

**Electrospun TiO<sub>2</sub> Nanofibers Integrating Space-separated Magnetic Nanoparticles and Heterostructures for Recoverable and Efficient Photocatalyst**

Dahubaiyila,<sup>a,b</sup> Xiaohui Wang,<sup>a,b</sup> Xin Li<sup>b</sup>, Baosharileaidu<sup>b</sup>, Xiaotian Li,<sup>\*a</sup> Liang Xu<sup>b</sup>, Zongrui Liu<sup>b</sup> Limei Duan,<sup>\*b</sup> and Jinghai Liu<sup>\*b</sup>

<sup>a</sup> *Department of Material Science and Engineering, Jilin University, Changchun, 130012, P. R. China.*

*E-mail: xiaotianli@jlu.edu.cn*

<sup>b</sup> *Institute of Functional Materials, College of Chemistry and Chemical Engineering, Inner Mongolia University for The Nationalities, Tongliao, 028000, P. R. China..*

*Fax: +86 (0)475-8313162;*

*Tel: +86 (0)475-8251135;*

*E-mail: jhliu2008@sinano.ac.cn; duanlmxie@126.com*

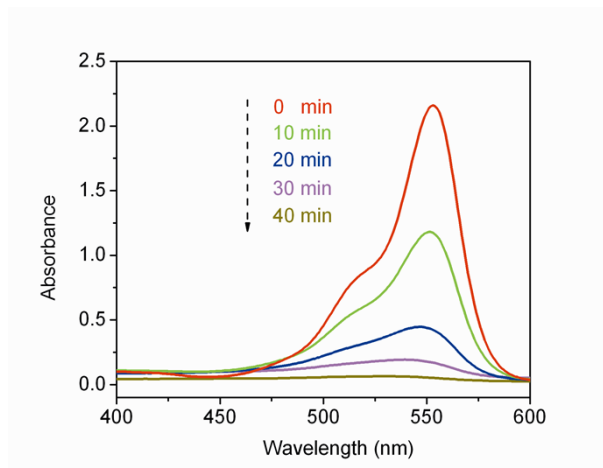

**Fig. S1** UV-Vis absorption spectra of RhB during photocatalytic process for  $\text{Fe}_3\text{O}_4@\text{TiO}_2/\text{CdS-2}$  nanofibers.

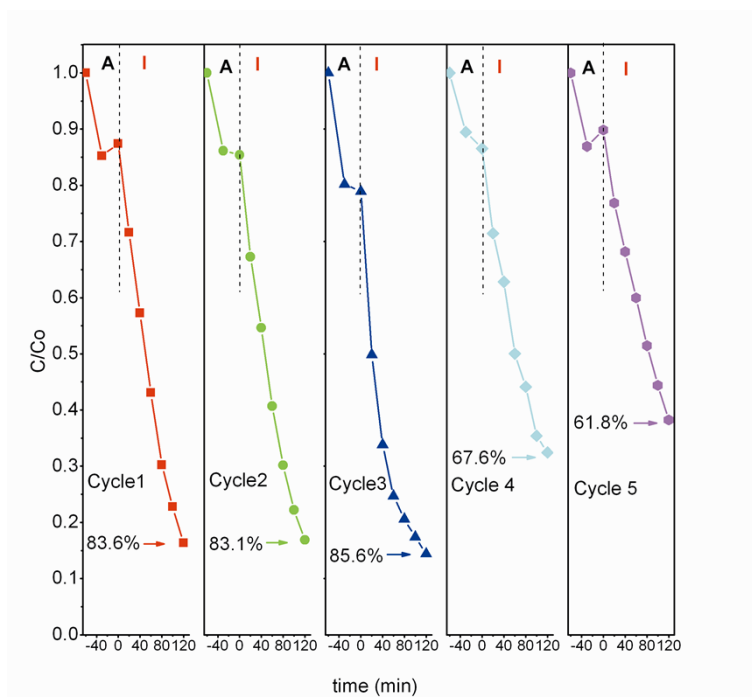

**Fig. S2** Cycling stability of adsorption and photocatalytic activity of  $\text{Fe}_3\text{O}_4@\text{TiO}_2/\text{CdS-3}$  nanofibers under simulated solar light irradiation by degrading the Rhodamine B (RhB) as a model organic pollutant ( $\text{Fe}_3\text{O}_4@\text{TiO}_2/\text{CdS-3}$  nanofibers 20 mg and RhB 10 mg L<sup>-1</sup>). A: Adsorption in the dark. I: irradiation under simulated solar light.

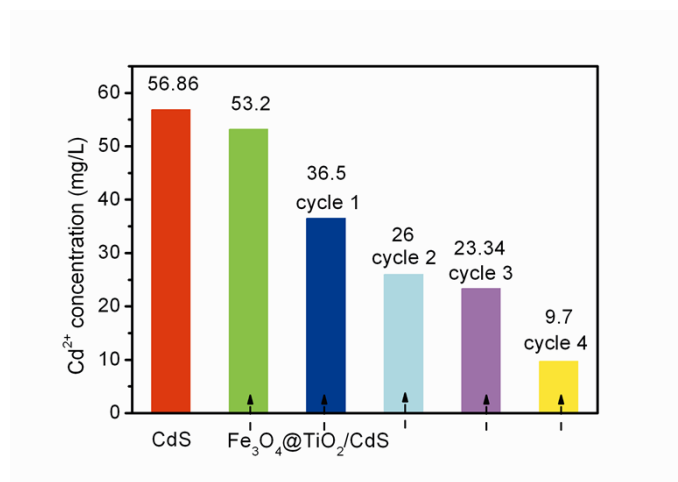

**Fig. S3** Cadmium ion ( $\text{Cd}^{2+}$ ) concentration ( $C_{\text{Cd}^{2+}}$ ) in the solution after adsorption and solar light irradiation by ICP-AES. CdS control and  $\text{Fe}_3\text{O}_4@\text{TiO}_2/\text{CdS}$ -3 nanofibers with CdS weight percent of 70 wt%. The amount of CdS and  $\text{Fe}_3\text{O}_4@\text{TiO}_2/\text{CdS}$ -3 nanofibers as photocatalyst is 20 mg.

**Table 1** Comparison of adsorption and photocatalytic activity of  $\text{Fe}_3\text{O}_4@\text{TiO}_2/\text{CdS}$  nanofiber (NF) and control samples under UV, Visible light and Simulated Solar light irradiation.

|                                                            | UV irradiation <sup>a</sup> |       | Visible light irradiation <sup>b</sup> |       | Solar light irradiation <sup>c</sup> |       |
|------------------------------------------------------------|-----------------------------|-------|----------------------------------------|-------|--------------------------------------|-------|
|                                                            | A†(%)                       | D†(%) | A(%)                                   | D(%)  | A(%)                                 | D(%)  |
| TiO <sub>2</sub> NF                                        | 12.31                       | 92.06 | 7.02                                   | 10.53 | 7.05                                 | 25.65 |
| Fe <sub>3</sub> O <sub>4</sub> @TiO <sub>2</sub> NF        | 10.37                       | 97.86 | 6.63                                   | 11.67 | 5.95                                 | 42.56 |
| Fe <sub>3</sub> O <sub>4</sub> @TiO <sub>2</sub> /CdS-1 NF | 7.35                        | 93.55 | 6.44                                   | 71.27 | 8.43                                 | 71.61 |
| Fe <sub>3</sub> O <sub>4</sub> @TiO <sub>2</sub> /CdS-2 NF | 18.28                       | 94.23 | 34.29                                  | 78.61 | 12.87                                | 94.78 |
| Fe <sub>3</sub> O <sub>4</sub> @TiO <sub>2</sub> /CdS-3 NF | 21.08                       | 97.65 | 6.44                                   | 90.45 | 12.38                                | 92.55 |
| CdS control                                                | x                           | x     | 12.02                                  | 58.21 | 6.12                                 | 52.8  |

† A, Adsorption and P, photocatalysis

<sup>a</sup> High pressure Hg lamp

<sup>b</sup> Xe lamp with visible light cut-off filter (>400 nm)

<sup>c</sup> Xe lamp with simulated solar light filter

NF: nanofiber
